# Supplementary material for: Functionalized O-carboxymethyl-chitosan/polyethylenimine based novel dual pH-responsive nanocarriers for controlled co-delivery of DOX and genes
Source: Royal Society of Chemistry journal article supplement (doi:10.1039/c5py00013k), 2015-01-01
Supplement: c5py00013k1.pdf [file c5py00013k1.pdf]

Supporting Information:

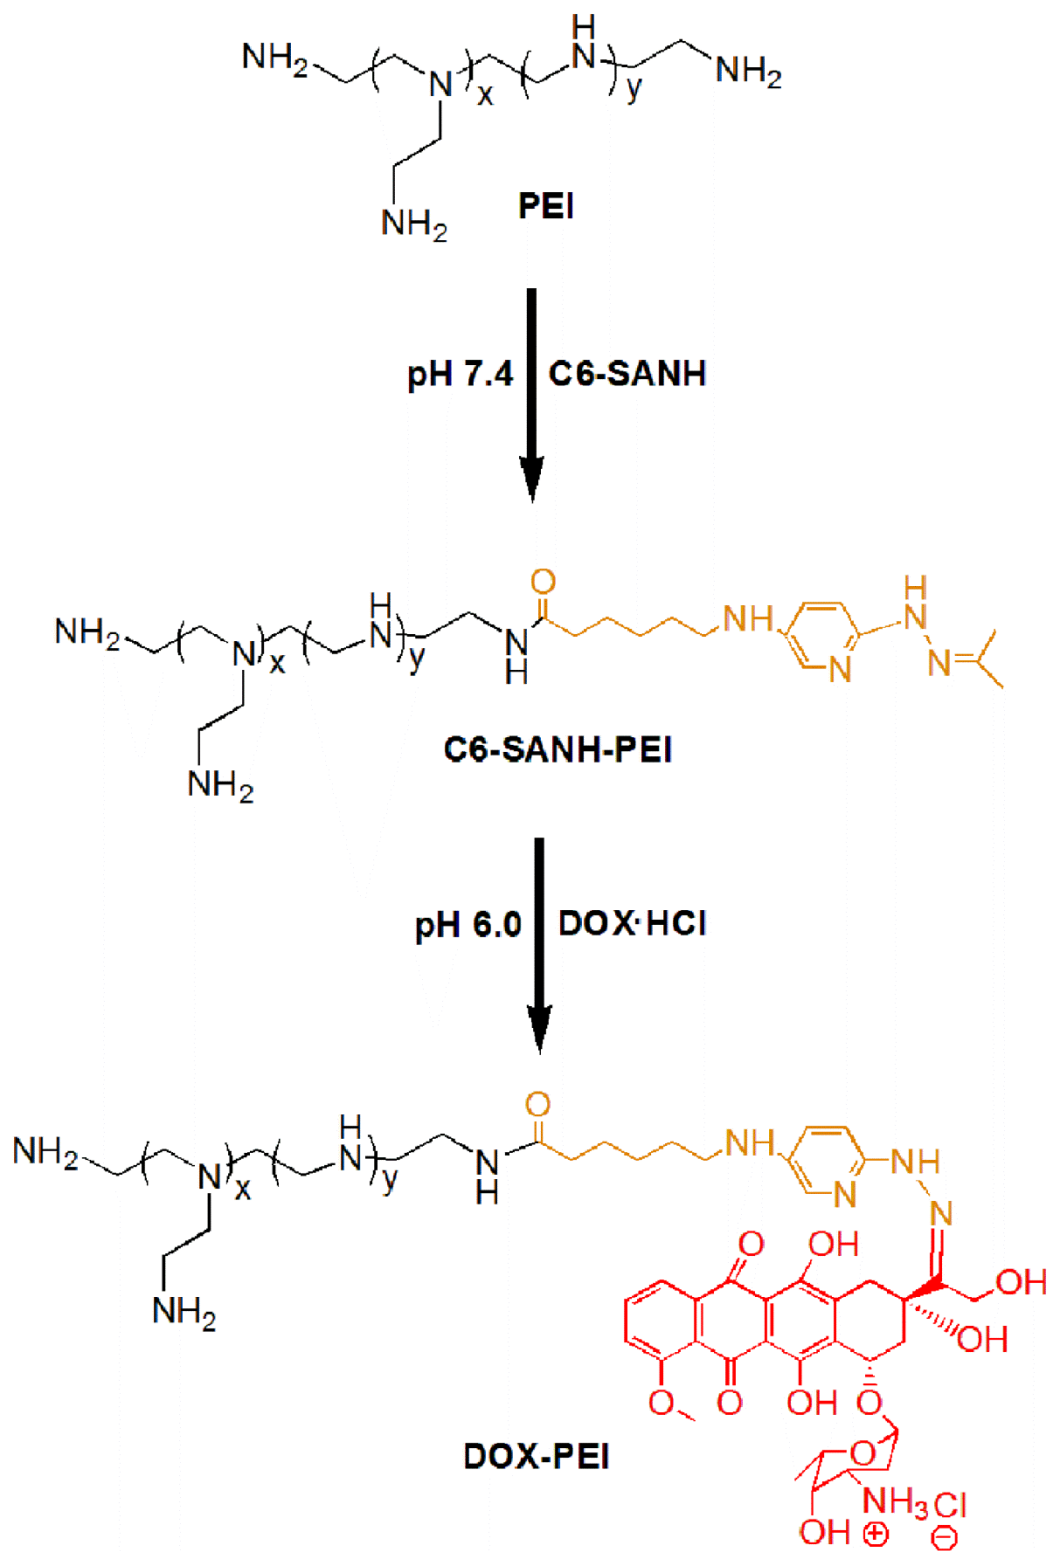

Fig. S1 Synthesis scheme of DP

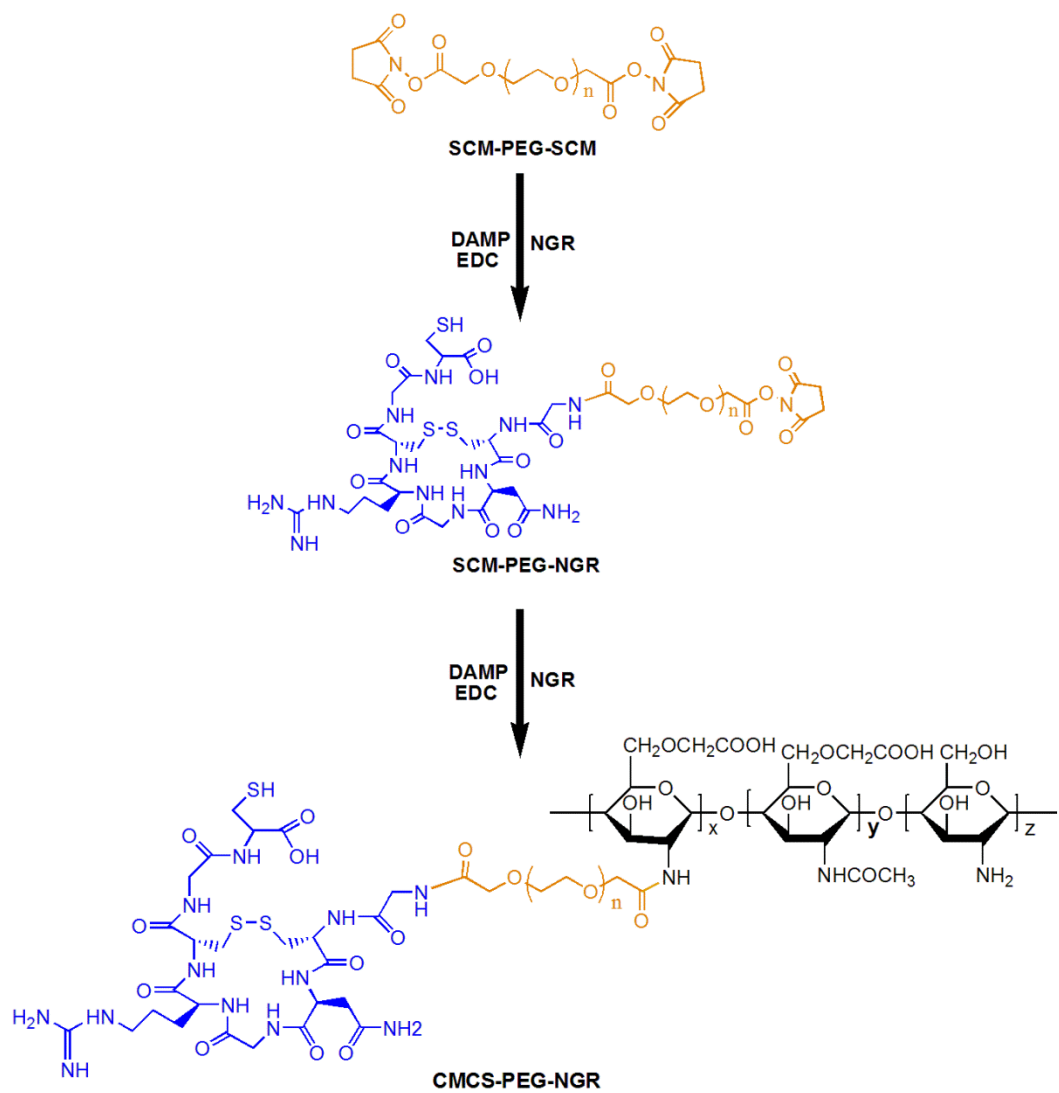

**Fig. S2** Synthesis scheme of CPN

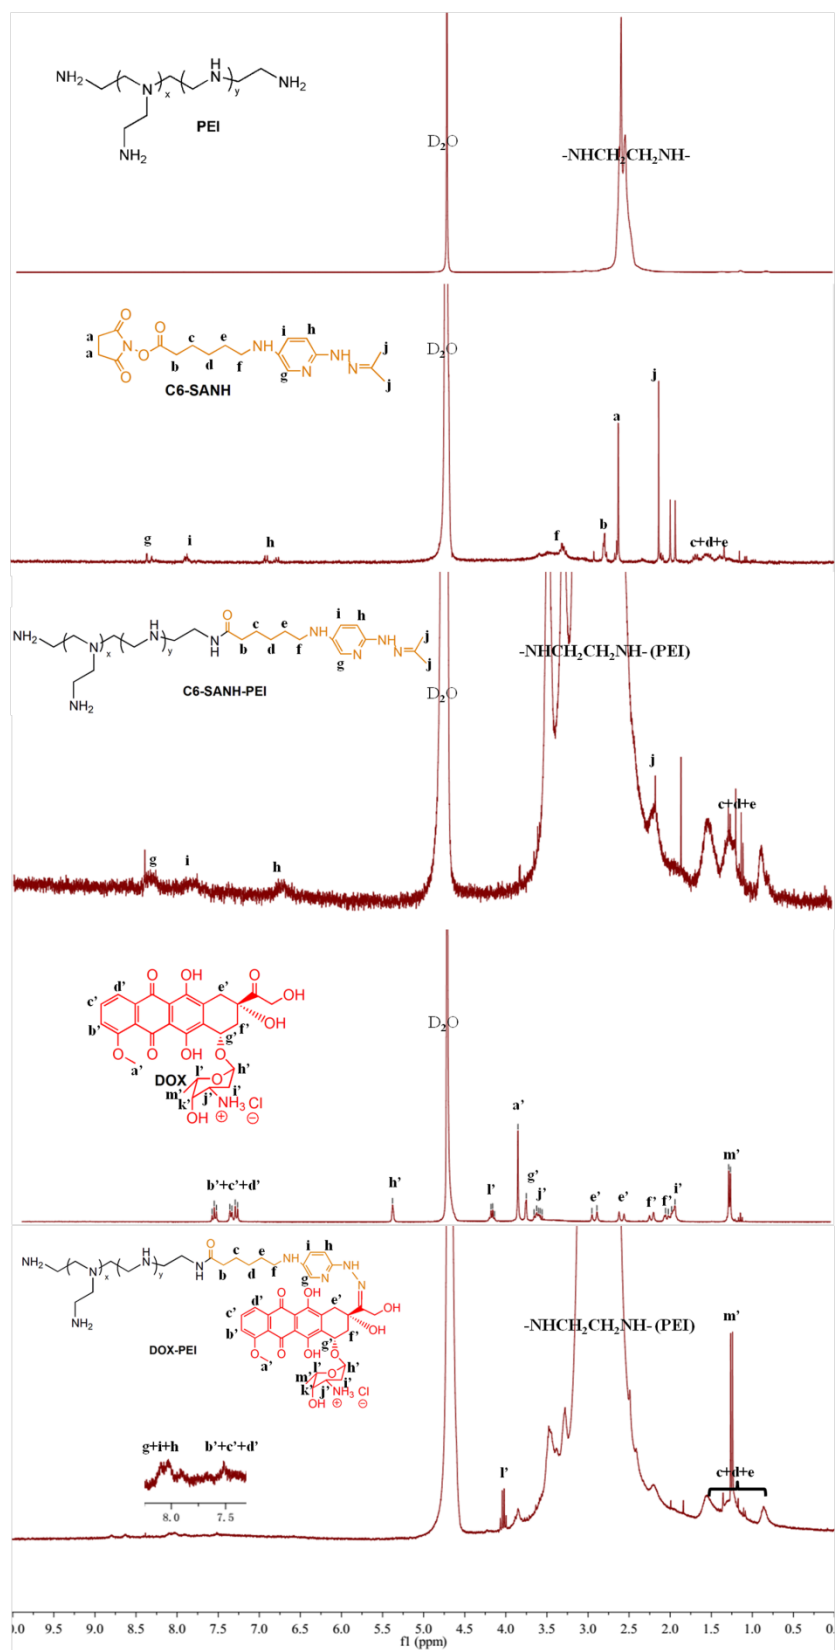

Fig. S3  $^1\text{H}$  NMR of PEI, C6-SANH, DOX, C6-SANH-PEI and DOX-PEI

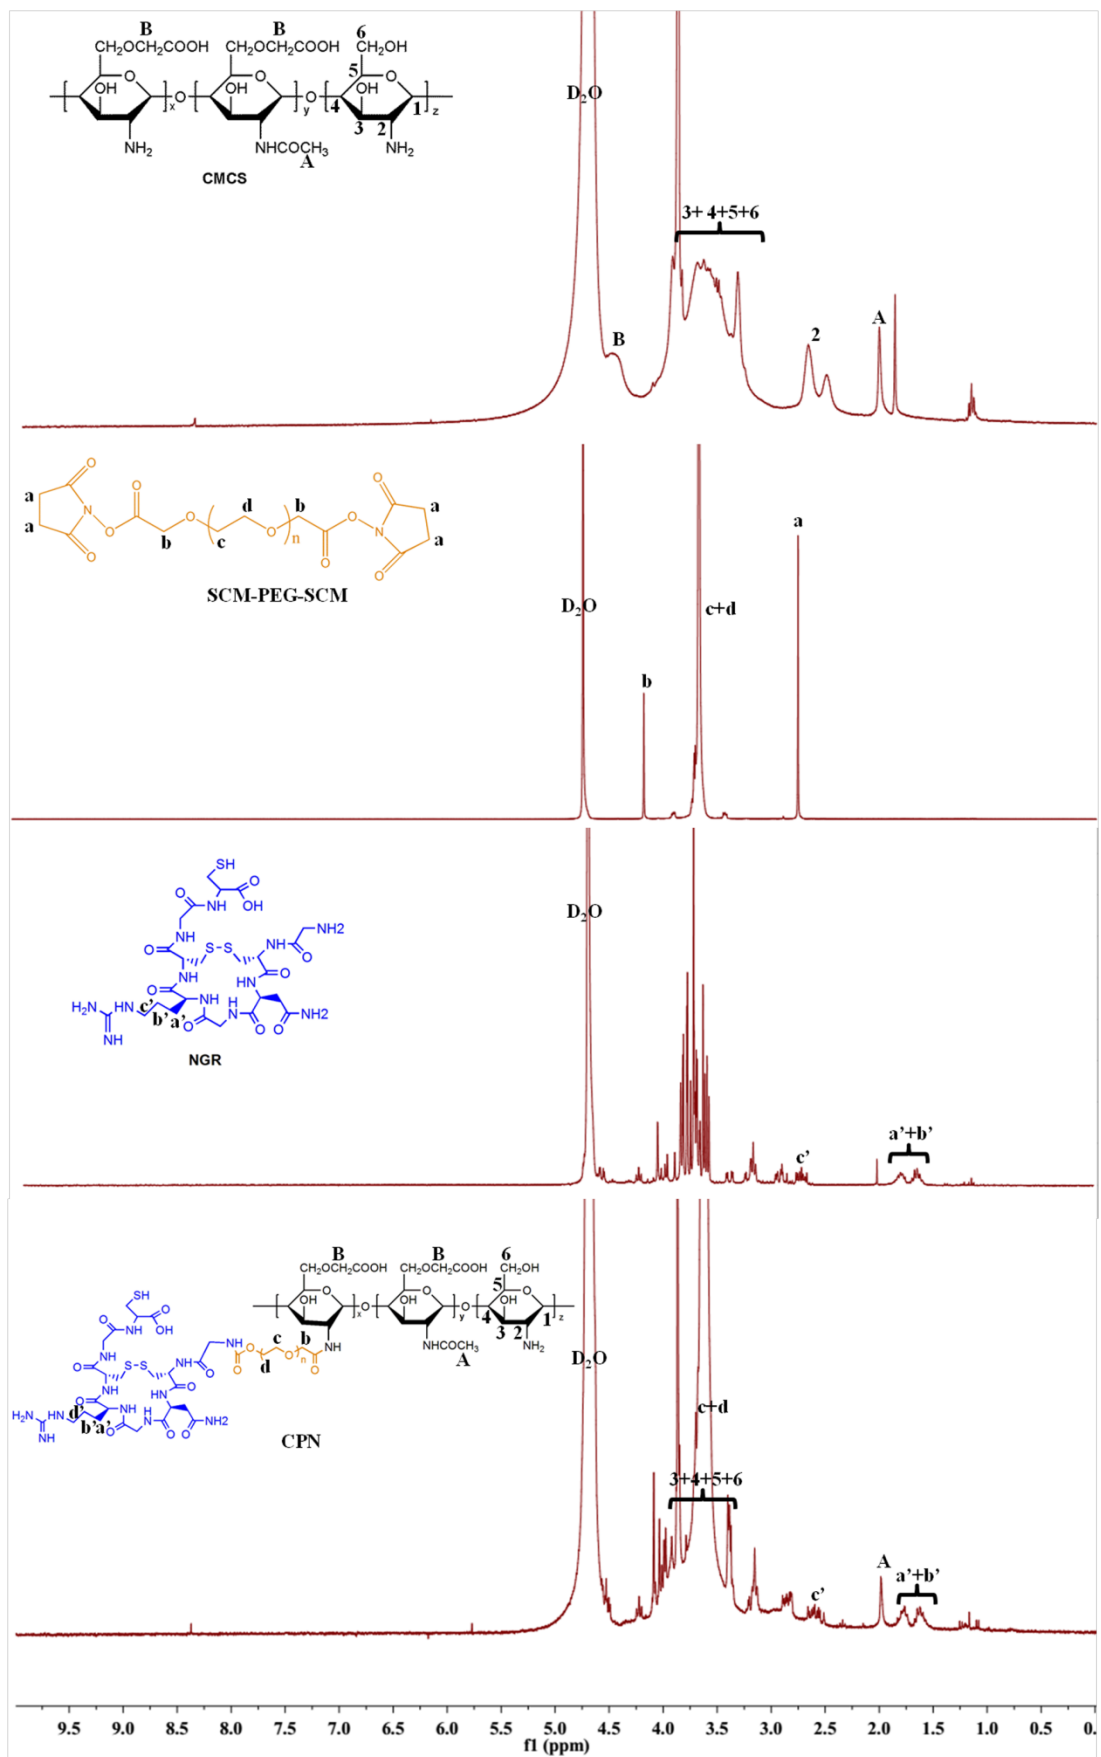

Fig. S4  $^1\text{H}$  NMR of CMCS, PEG, NGR and CPN

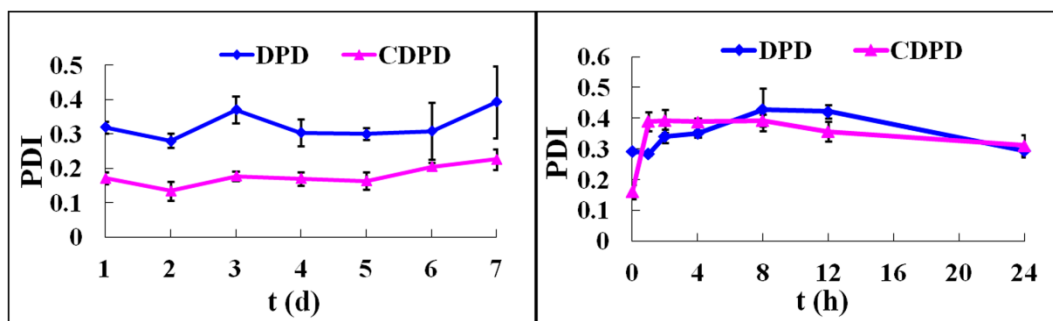

**Fig. S5** (A) The changes of PDI of DPD and CDPD in distilled water for 7 days, and DPD was more stable than CDPD obviously; (B) The changes of PDI of DPD and CDPD in DMEM with 10% FBS at 37°C for 24 h, and CDPD was more stable than DPD obviously.
